# Supplementary material for: Early–Middle Pleistocene Magnetostratigraphic and Rock Magnetic Records of the Dolynske Section (Lower Danube, Ukraine) and Their Application to the Correlation of Loess–Palaeosol Sequences in Eastern and South-Eastern Europe
Source: MDPI journal article supplement (doi:10.3390/quat4040043), 2021-12-02
Supplement: s1 [file s1]

Magnetic fabric data from the Dolynske loess-palaeosol sequence.  
Palaeomagnetic investigation of the lowermost part of the Kurortne section

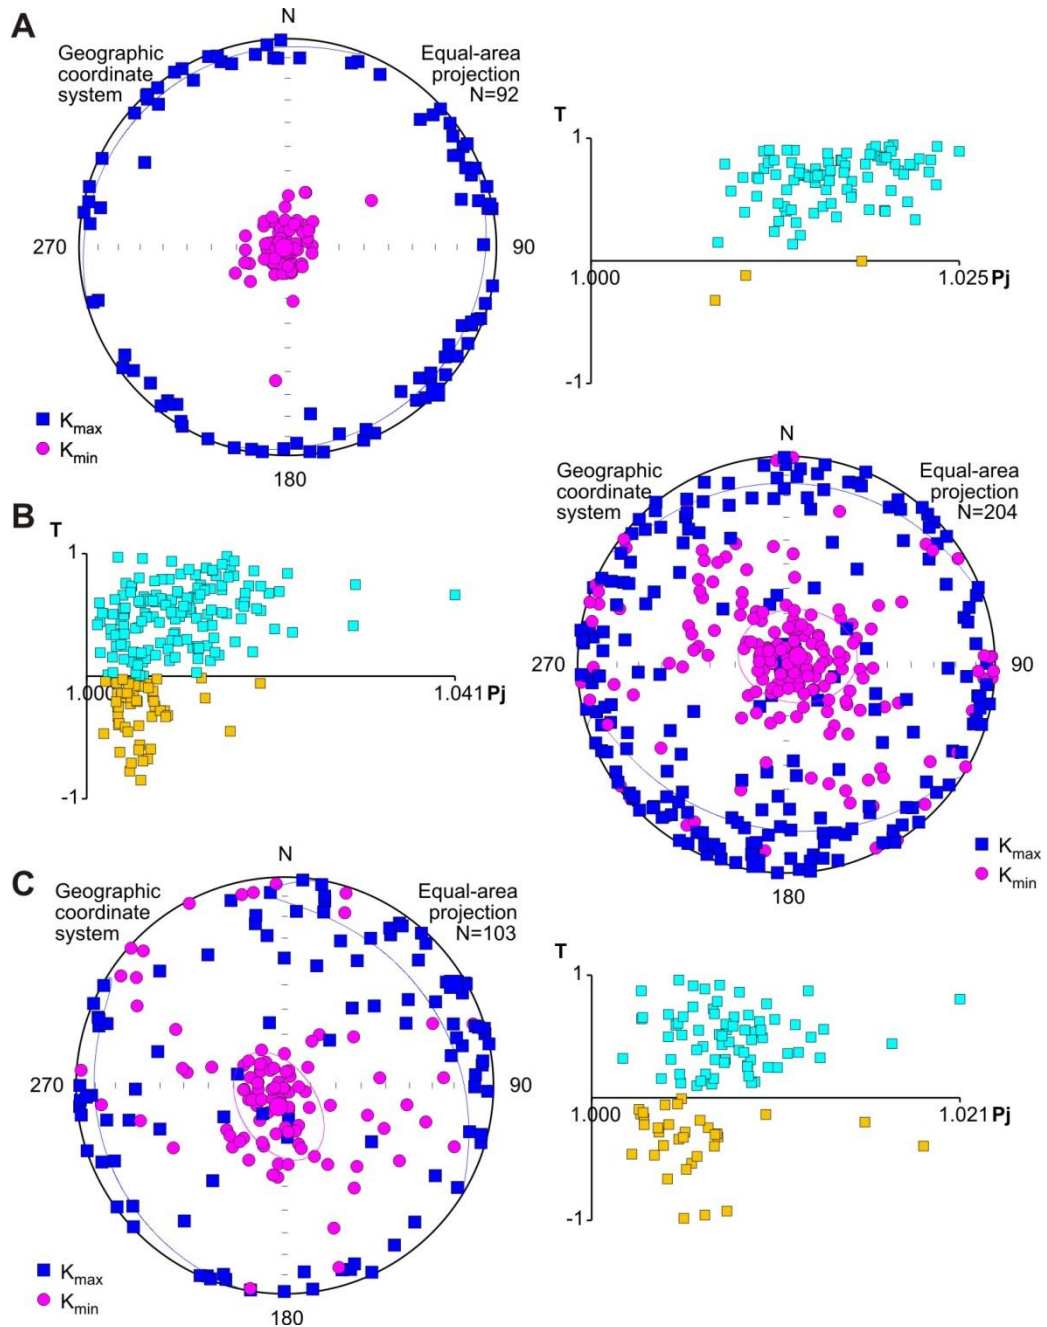

**Figure S1.** Magnetic fabric data based on anisotropy of magnetic susceptibility parameters from (A) loess specimens, (B) – palaeosol specimens above the MBB, and (C) – palaeosol specimens below the MBB at the Dolynske section. Directions of the maximum principal axes ( $K_{\max}$ ) and minimum principal axes  $K_{\min}$  are shown on stereographic projections by squares and circles, respectively; N – number of specimens; T (shape parameter) versus  $P_j$  (degree of anisotropy).

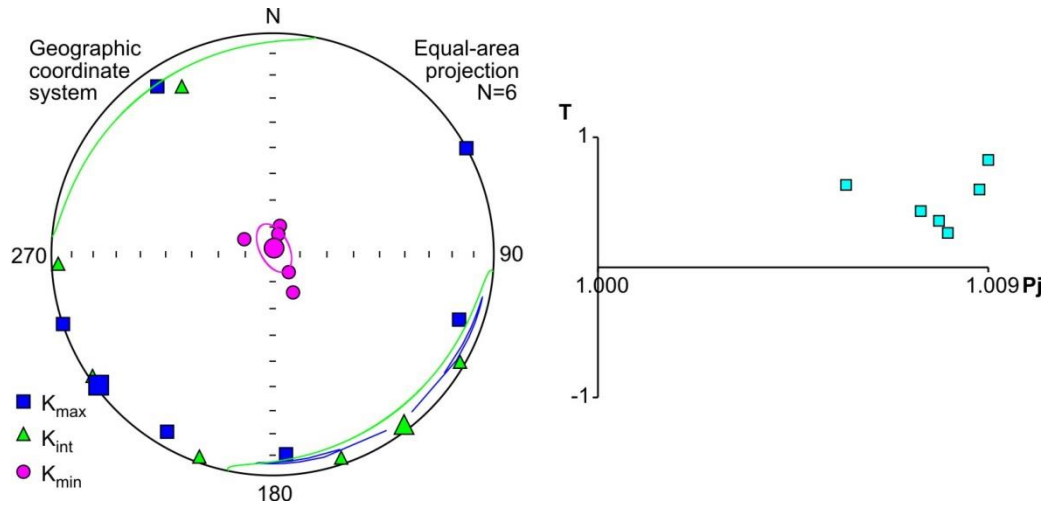

**Figure S2.** Magnetic fabric data based on anisotropy of magnetic susceptibility parameters from palaeosols of the K-S6 unit at the Kurortne section. Directions of the maximum principal axes ( $K_{max}$ ), intermediate principal axes ( $K_{int}$ ) and minimum principal axes  $K_{min}$  are shown on stereographic projections by squares, triangles and circles, respectively; N – number of specimens; T (shape parameter) versus  $P_j$  (degree of anisotropy) [240].

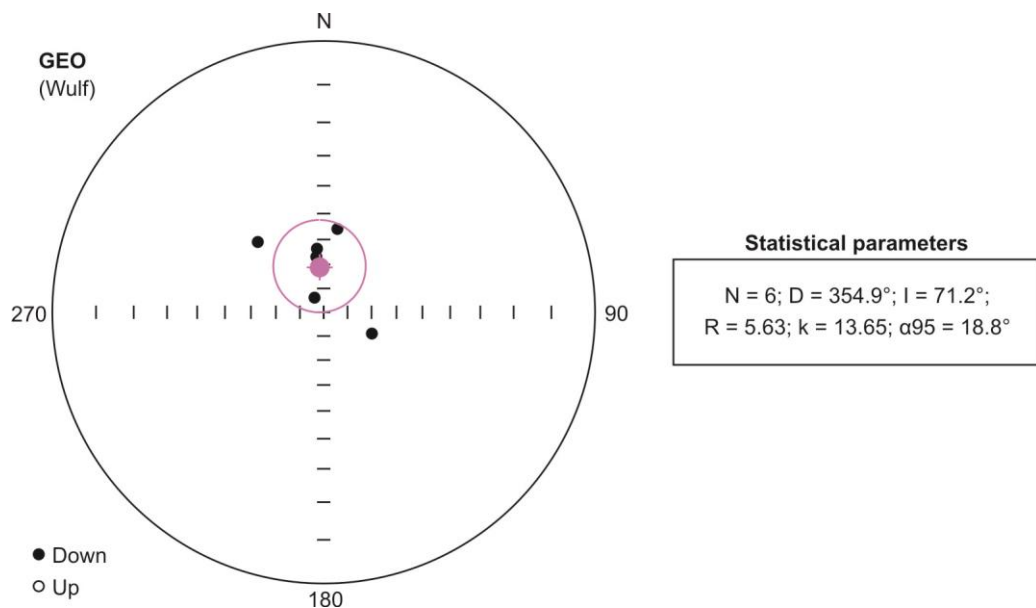

**Figure S3.** Stereographic projections of ChRM directions calculated after thermal demagnetization of soil specimens from the K-S6 unit at the Kurortne section. Full and open circles represent projections in the lower and upper hemispheres, respectively. Average values for vectors projections were calculated: N – quantity of specimens; D – declination, I – inclination, R – resultant vector, k – precision parameter,  $\alpha_{95}$  – confidence limit [264].

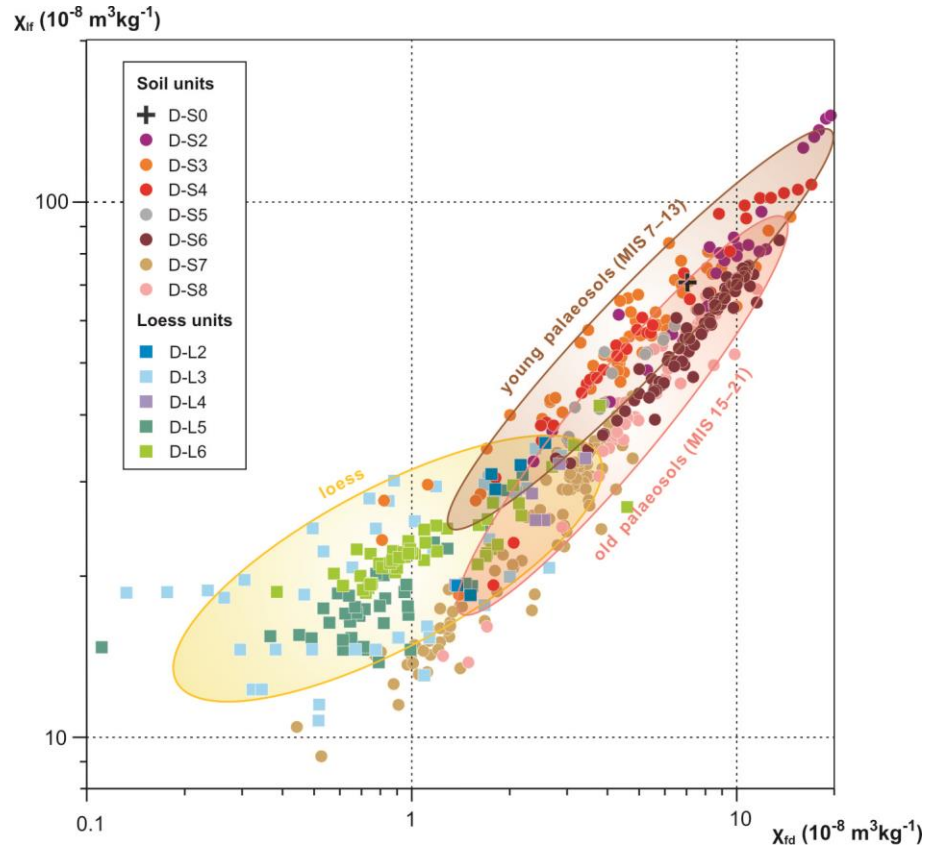

**Figure S4.** Low-frequency susceptibility ( $\chi_{lf}$ ) plotted against frequency dependence susceptibility ( $\chi_{fd}$ ) of soil (circles) and loess (squares) specimens as a characteristic of magnetic enhancement for the Dolynske loess-palaeosol sequence.
